# Supplementary figures and images for: Evaluation of actigraphy-measured sleep patterns among children with disabilities and associations with caregivers’ educational attainment: results from a cross-sectional study
Source: HighWire-hosted journal article supplement (doi:10.1136/bmjopen-2015-008589), 2015-12-01

**A. Sleep latency, P=0.804**

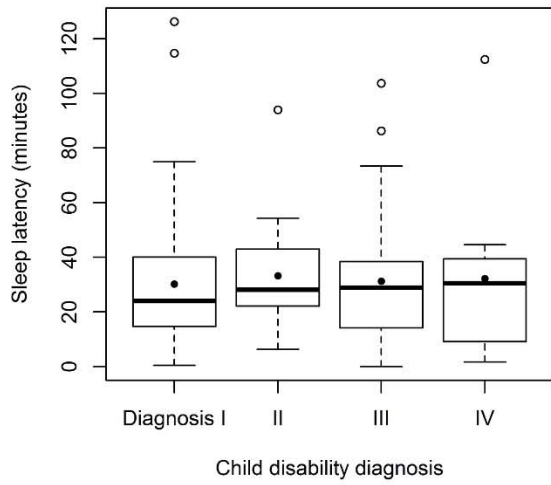

**B. Wake after sleep onset, P=0.252**

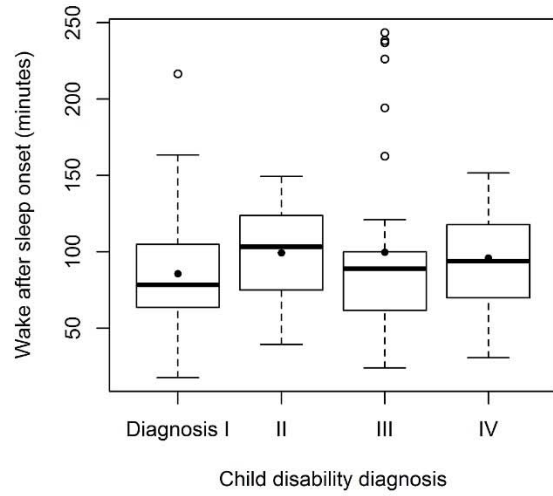

**C. Sleep duration, P=0.138**

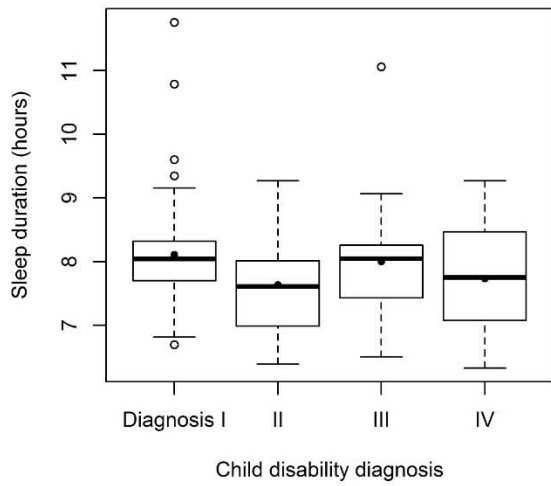

**D. Sleep efficiency, P=0.309**

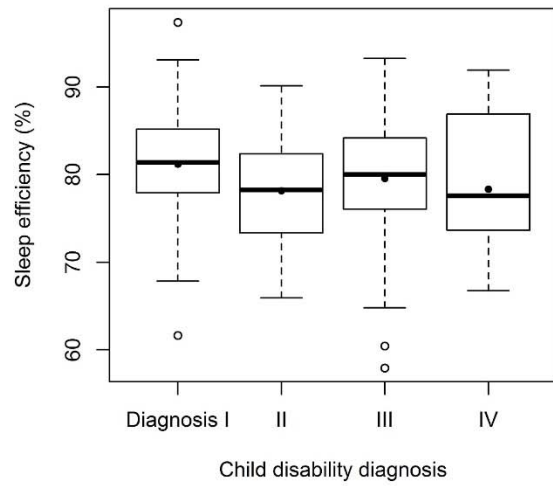

Supplement: bmjopen-2015-008589supp_figure.pdf [file bmjopen-2015-008589supp_figure.pdf]
